# Supplementary material for: Dietary Pattern Associated with the Risk of Poor Glycemic Control in Chinese Diabetic Adults: Results from the China Nutrition and Health Surveillance 2015–2017 Survey
Source: MDPI journal article supplement (doi:10.3390/nu15010056), 2022-12-23
Supplement: s1 [file s1]

**Supplementary Table S1.** Recommendation of percentage of macronutrients intake from energy intake according to the *Guideline for the Prevention and Treatment of Type 2 Diabetes Mellitus in China (2020 edition)*.

|             | <b>Low</b> | <b>Moderate</b> | <b>High</b> |
|-------------|------------|-----------------|-------------|
| <b>PECI</b> | <50%       | 50%~65%         | >65%        |
| <b>PEPI</b> | <15%       | 15%~20%         | >20%        |
| <b>PEFI</b> | <20%       | 20%~30%         | >30%        |

PECI.: Percentage of energy from carbohydrate intake; PEPI.: Percentage of energy from protein intake; PEFI.: Percentage of energy from fat intake.
